# Supplementary material for: Ternary solvent for CH3NH3PbI3 perovskite films with uniform domain size
Source: Royal Society of Chemistry journal article supplement (doi:10.1039/c6cp06709c), 2016-11-30
Supplement: c6cp06709c1.pdf [file c6cp06709c1.pdf]

## Ternary solvent for the $\text{CH}_3\text{NH}_3\text{PbI}_3$ perovskite film with uniform domain size

Lin Xie<sup>1</sup>, Heewon Hwang<sup>1</sup>, Minjung Kim<sup>1</sup> and Kyungkon Kim<sup>1\*</sup>

<sup>1</sup> Department of Chemistry and Nano Science, Ewha Womans University, Seoul,  
Korea

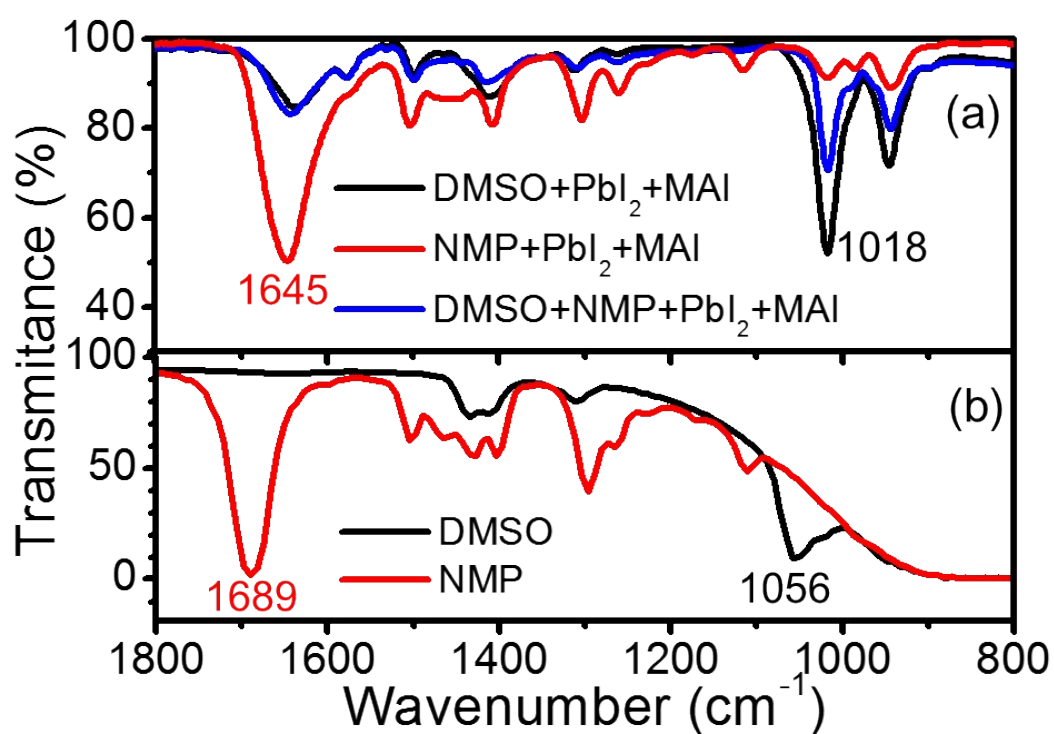

Figure S1 (a). FT-IR spectra of DMSO- $\text{PbI}_2$ -MAI powder (black line), NMP- $\text{PbI}_2$ -MAI powder (red line), and DMSO-NMP- $\text{PbI}_2$ -MAI powder (blue line). (b) FT-IR spectra of the DMSO (black) and the NMP (red).

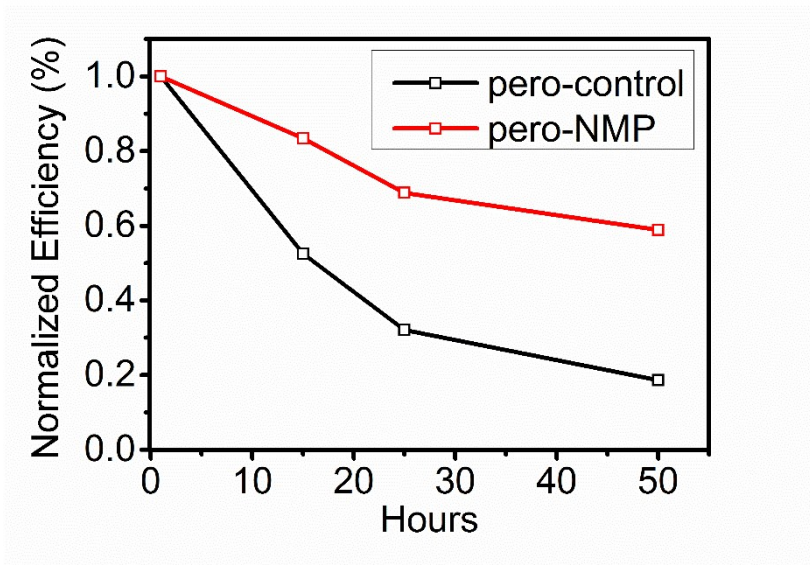

Figure S 2. The stability of the pero-control and pero-NMP devices under the one sun light soaking at 50°C for 50 hours.

Table S1, the weight ratio of the  $\text{PbI}_2$ , MAI and different single solvent in the solutions.

|                                     |             |                        |
|-------------------------------------|-------------|------------------------|
| <b>DMSO</b>                         | <b>MAI</b>  | <b>PbI<sub>2</sub></b> |
| 54.2%                               | 11.8%       | 54.0%                  |
| <b>GBL</b>                          | <b>MAI</b>  | <b>PbI<sub>2</sub></b> |
| 54.9                                | 11.5%       | 33.6%                  |
| <b>NMP</b>                          | <b>MAI</b>  | <b>PbI<sub>2</sub></b> |
| 52.5%                               | 12.2        | 35.3%                  |
| <b>DMSO + GBL</b>                   | <b>MAI</b>  | <b>PbI<sub>2</sub></b> |
| 54.5%                               | 11.7%       | 33.8%                  |
| (DMSO 26.9% + GBL 27.6%)            |             |                        |
| <b>DMSO + GBL + NMP</b>             | <b>MAI</b>  | <b>PbI<sub>2</sub></b> |
| 54.1%                               | 11.8%       | 34.1%                  |
| (DMSO 21.7% + GBL 22.3 + NMP 10.1%) |             |                        |
| <b>DMSO+NMP</b>                     | <b>MAI</b>  | <b>PbI<sub>2</sub></b> |
| 53.4%                               | <b>12%</b>  | <b>34.7%</b>           |
| (DMSO 27.6% + NMP 25.8%)            |             |                        |
| <b>GBL+NMP</b>                      | <b>MAI</b>  | <b>PbI<sub>2</sub></b> |
| 53.7%                               | <b>11.9</b> | <b>34.4%</b>           |
| (GBL 28.1% + NMP 25.6%)             |             |                        |

**Comment [KK]:** Included the weigh ratio of GBL, DMSO and NMP only

Table S 2. The temperatures of the weight loss at 10% and 20% of different solutions.

|                                      |    | <b>Solution</b>  | <b>Temperature at<br/>10% weight<br/>loss (°C)</b> | <b>Temperature at<br/>20% weight<br/>loss (°C)</b> |
|--------------------------------------|----|------------------|----------------------------------------------------|----------------------------------------------------|
| Pure solvent                         | 1  | DMSO             | 67.79                                              | 79.63                                              |
|                                      | 2  | GBL              | 87.9                                               | 102.0                                              |
|                                      | 3  | NMP              | 82.84                                              | 100.2                                              |
|                                      | 4  | DMSO + GBL       | 79.49                                              | 97.53                                              |
|                                      | 5  | DMSO + GBL + NMP | 71.65                                              | 85.02                                              |
|                                      | 6  | DMSO + NMP       | 75.47                                              | 93.38                                              |
|                                      | 7  | GBL + NMP        | 71.65                                              | 85.02                                              |
| MAI, PbI <sub>2</sub><br>and solvent | 8  | DMSO             | 95.17                                              | 110.7                                              |
|                                      | 9  | GBL              | 94.23                                              | 108.4                                              |
|                                      | 10 | NMP              | 101.4                                              | 117.4                                              |
|                                      | 11 | DMSO + GBL       | 82.88                                              | 96.10                                              |
|                                      | 12 | DMSO + GBL + NMP | 84.84                                              | 99.01                                              |
|                                      | 13 | DMSO + NMP       | 100.4                                              | 116.4                                              |
|                                      | 14 | GBL + NMP        | 101.9                                              | 116.5                                              |
